## Correction: Aptamer: A potential oligonucleotide nanomedicine in the diagnosis and treatment of hepatocellular carcinoma

Rusdina Bte Ladju<sup>1,2</sup>, Devis Pascut<sup>1</sup>, Muhammad Nasrum Massi<sup>2</sup>, Claudio Tiribelli<sup>1</sup> and Caecilia H.C. Sukowati<sup>1</sup>

<sup>1</sup> Fondazione Italiana Fegato, AREA Science Park Basovizza, Trieste, Italy

<sup>2</sup> Faculty of Medicine, Hasanuddin University, Makassar, Indonesia

**Published:** February 26, 2018

**Copyright:** Ladju et al. This is an open-access article distributed under the terms of the Creative Commons Attribution License 3.0 (CC BY 3.0), which permits unrestricted use, distribution, and reproduction in any medium, provided the original author and source are credited.

**This article has been corrected:** The updated Acknowledgments information is provided below:

### ACKNOWLEDGMENTS

RBL is supported by fellowships from the Lembaga Pengelola Dana Pendidikan (LPDP) of the Indonesian Ministry of Monetary, DP by NECTE project of PAR-FSC\_2007-13 decree n° 3984/LAVFOR.ISTR/2014 Friuli Venezia Giulia, CHCS fellowship was partially supported by grant NIH U01AA020821. This work was supported by in-house grant from the Fondazione Italiana Fegato, Trieste, Italy, and the Faculty of Medicine, Hasanuddin University, Makassar, Indonesia.

Original article: Oncotarget. 2018; 9:2951-2961. <https://doi.org/10.18632/oncotarget.23359>
